# 1 **Complex responses of global insect pests to climate change**

2

3 Philipp Lehmann<sup>1,2,4\*</sup>, Tea Ammunét<sup>3†</sup>, Madeleine Barton<sup>4†</sup>, Andrea Battisti<sup>5†</sup>, Sanford D.  
4 Eigenbrode<sup>6†</sup>, Jane Uhd Jepsen<sup>7†</sup>, Gregor Kalinkat<sup>8†</sup>, Seppo Neuvonen<sup>9†</sup>, Pekka  
5 Niemelä<sup>10†</sup>, Bjørn Økland<sup>11†</sup>, John S. Terblanche<sup>4†</sup>, Christer Björkman<sup>3</sup>

6

7 <sup>1</sup>Department of Zoology, Stockholm University, Sweden. <sup>2</sup>Centre of Excellence in  
8 Biological Interactions Research, Department of Biological and Environmental Science,  
9 University of Jyväskylä, Finland. <sup>3</sup>Department of Ecology, Swedish University of  
10 Agricultural Sciences, Sweden. <sup>4</sup>Centre for Invasion Biology, Department of Conservation  
11 Ecology and Entomology, Stellenbosch University, South Africa. <sup>5</sup>Department of  
12 Agronomy, Food, Natural Resources, Animals and the Environment, University of  
13 Padova, Italy. <sup>6</sup>Department of Plant, Soil and Entomological Sciences, University of  
14 Idaho, United States of America. <sup>7</sup>Department of Arctic Ecology, Norwegian Institute for  
15 Nature Research, Norway. <sup>8</sup>Department of Ecosystem Research, Leibniz-Institute of  
16 Freshwater Ecology and Inland Fisheries, Germany. <sup>9</sup>Kevo Subarctic Research Institute,  
17 University of Turku. <sup>10</sup>Biodiversity Unit, University of Turku, Finland. <sup>11</sup>Norwegian Institute  
18 of Bioeconomy Research, Norway.

19

20 \*Corresponding author: Philipp Lehmann, [philipp.lehmann@zoologi.su.se](mailto:philipp.lehmann@zoologi.su.se)

21 †Contributing authors listed alphabetically.

22 **Abstract**

23 Insect pests strongly affect the productivity and profitability of agriculture and forestry.  
24 Despite the well-known sensitivity of insects to abiotic effects such as temperature, their  
25 potential responses to ongoing climate change remain unclear. Here we compile and  
26 review documented climate change responses of 31 of the globally most impactful  
27 phytophagous insect pests, focussing on species for which long-term, high-quality data  
28 are available. Most of the selected species show at least one response affecting their  
29 severity as pests, including changes in geographic range, population dynamics, life-  
30 history traits, and/or trophic interactions. Of the studied pests, 41% only show responses  
31 that are linked to increased pest severity, 4% only show responses of decreased severity,  
32 whereas importantly 55%, the majority of studied pests, show mixed responses including  
33 both increased and decreased severity under ongoing climate change. Variability in  
34 impact is further supported by a thermal sensitivity analysis showing little benefit of  
35 climate warming in relation to the optimal developmental temperatures for the majority of  
36 these pests under both current climate and future projections. Overall the results show  
37 that calculating the net effect of climate change on phytophagous insect pest impact is  
38 far from straightforward. The documented variation in responses, e.g. between  
39 agricultural and forest pests, indicates that efforts to mitigate undesirable climate change  
40 effects must target individual species, taking into account the complex ecological and  
41 evolutionary mechanisms underlying their responses.

42

43 **Keywords:** climate adaptation, abiotic stress, integrated pest management, agricultural  
44 pest, forestry pest

## 45 **Introduction**

46 **Climate change and insect pest impact.** Insect pests have major detrimental impacts  
47 on agricultural and forestry production<sup>1</sup> that are likely to increase with anticipated rise in  
48 demands for food<sup>2</sup>, bioenergy feedstocks and other agricultural products. For example,  
49 animal pests (mainly insects) cause estimated losses of *ca.* 18% of total global annual  
50 crop production<sup>3</sup>. Many forest pests, such as the gypsy moth (*Lymantria dispar*) and  
51 mountain pine beetle (*Dendroctonus ponderosae*), also have severe ecological impacts:  
52 displacing native species, causing widespread defoliation and tree mortality, disrupting  
53 ecosystem functions and diminishing biodiversity<sup>4,5</sup>. Further, managing insect pests is  
54 generally financially costly. For example, estimated global costs of managing only one  
55 pest species, the diamondback moth (*Plutella xylostella*), are 4-5 billion USD annually<sup>6</sup>.  
56 Moreover, many agricultural and forest insect pests are also invasive species that  
57 contribute to negative ecological consequences and the global costs of managing or  
58 mitigating such invasions are estimated to exceed 76.9 billion USD annually<sup>7</sup>.

59  
60 The substantial global challenges posed by phytophagous insect pests can be  
61 exacerbated by ongoing and projected large-scale climatic changes<sup>8</sup> which could promote  
62 increases in pest populations and resulting economic losses<sup>9-12</sup>. Alternatively, pests can  
63 be constrained by their environmental niche requirements, physiological tolerances, and  
64 phenological or life-history responses to climate, leading to local population declines or  
65 extinctions as climates change<sup>13,14</sup>. Clearly, detailed knowledge of insect pests' current  
66 and likely responses to ongoing climate change is essential to counter changing risks.  
67 Widespread ecological damage through range expansions and increasing frequencies of

68 outbreaks are increasingly reported<sup>14-17</sup>, but there is a severe deficiency in  
69 comprehensive information on insect pests' responses<sup>18-20</sup>.

70

71 **Climate change and insect pest biology.** Efforts to predict climate change impacts on  
72 insect pests are typically based on empirical studies of distribution responses to  
73 geographical and temporal variation in climate, mechanistic studies of physiological  
74 responses<sup>21,22</sup>, mechanistic studies of insect responses to varying abiotic conditions  
75 (often in controlled laboratory environments)<sup>23</sup>, climate modelling studies<sup>24,25</sup>, or some  
76 combination of these approaches<sup>19</sup>. A common assumption in studies of pests' responses  
77 is that climate-limiting factors are constant across their geographic ranges<sup>26</sup>. Thus studies  
78 typically ignore intraspecific variation, a well-known source of variability in climate  
79 responses<sup>9,22,27</sup>. Also, pest ranges generally span multiple environments, often including  
80 various types of managed landscapes<sup>28</sup>, forming complex dynamic matrices of pest-  
81 ecosystem interactions<sup>20,29</sup>. Furthermore, analyses tend to consider a single response  
82 (e.g. range expansion), rather than the wide range of pests' potential responses to climate  
83 change<sup>20</sup>, which can be divided into at least four main categories that are non-mutually  
84 exclusive<sup>18</sup>: changes in geographic range<sup>30</sup>, life-history traits<sup>31</sup>, population dynamics<sup>32,33</sup>,  
85 and trophic interactions<sup>34</sup> (Fig. 1). Changes in range and particularly population dynamics  
86 are likely to be directly linked to economic damage.

87

88 To assess current empirically-based knowledge within these four categories of response  
89 to climate change, we reviewed primary literature on 31 globally detrimental insect pest  
90 species. Species were selected to cover both agricultural and forestry pests, representing

91 various feeding guilds (Fig. S1), being present in various biomes and having large  
92 geographic ranges (Fig. 1). Furthermore, we only selected species that have been well  
93 studied over a long period. While this approach perhaps leads to biases in terms of  
94 geographical range and taxonomy, we feel that it is compensated by having high-quality  
95 comprehensive datasets available for the species. This is also critical for allowing an  
96 integrated assessment of all the four major response categories outlined above in each  
97 species and would not be possible otherwise. As there is a need for more information on  
98 biological mechanisms relating to past and present climate change responses in several  
99 key biological traits for single organisms<sup>18</sup>, we here provide an update on a number of  
100 such mechanisms (range expansion, life-history, population dynamics and trophic  
101 interactions) for the selected species in hopes that the data can be used for further  
102 predictive modelling. This information is presented in the form of species-specific  
103 descriptions and data tables in Supplement 1. We also identify critical knowledge gaps,  
104 and highlight aspects that require further research to anticipate, mitigate and manage  
105 climate-driven changes in pest impacts.

106

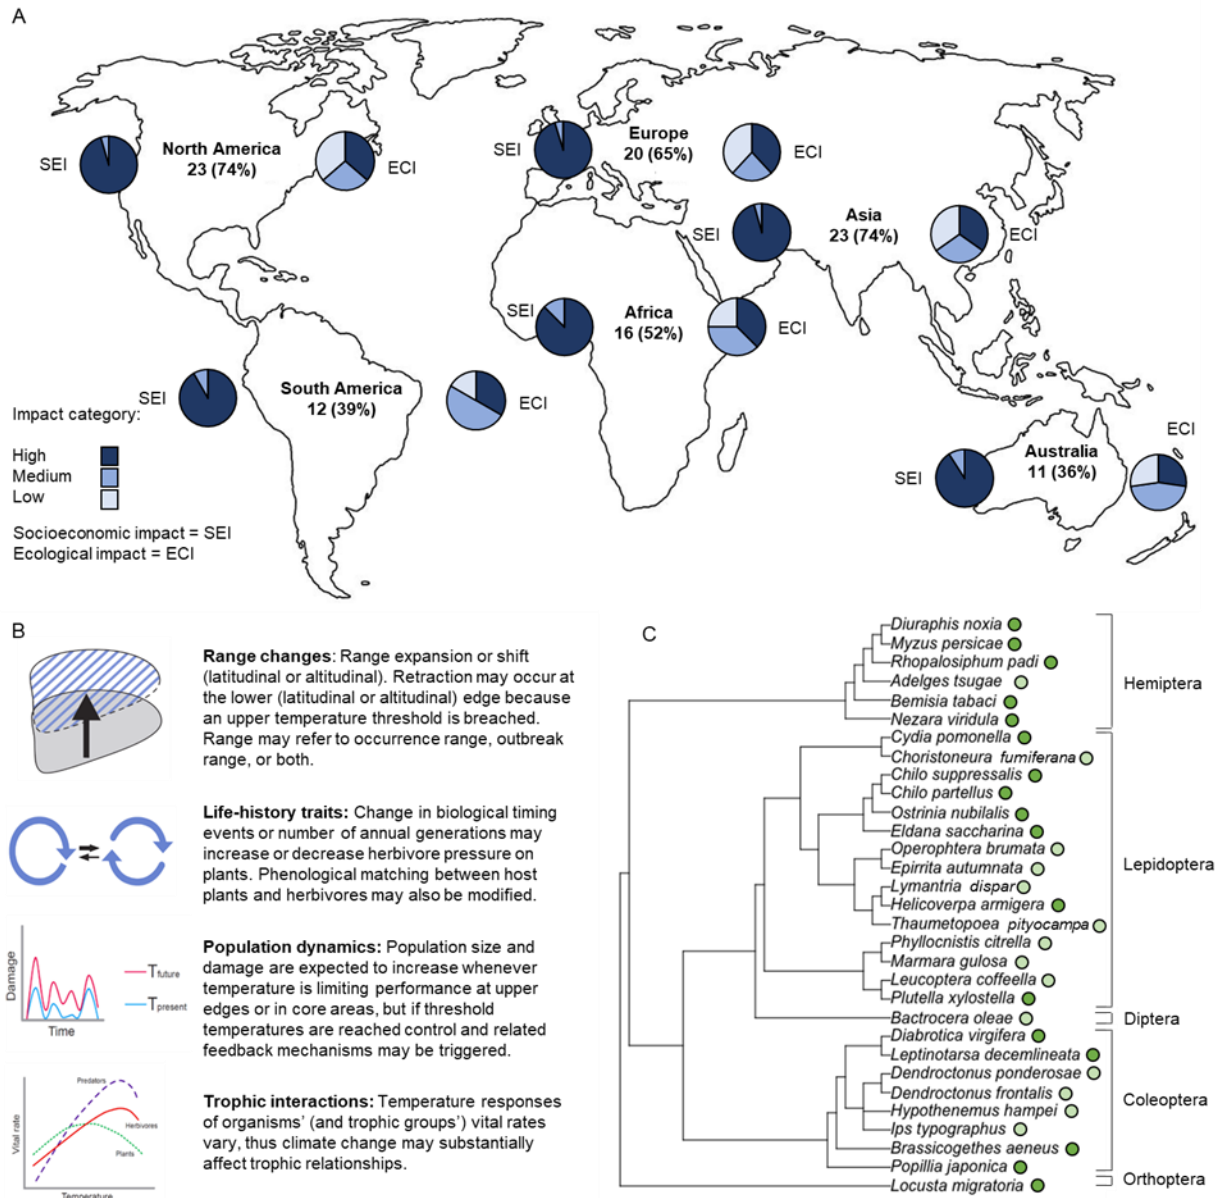

107

108

109 **Fig. 1** The distribution of 31 insect pests according to (A) the number of species in the  
 110 study occurring in each continent (with % of all those included) according to CABI. Note  
 111 that many species occur on multiple continents. Flanking each continent are pie charts  
 112 showing the distribution of socioeconomic impacts and ecological impacts caused by  
 113 these species. (B) Schematic representation of four major categories of responses to

114 *climate change: range changes, life-history traits, population dynamics and trophic*  
115 *interactions (see Supplement 2). (C) A phylogenetic tree (compiled from the Tree-of-life*  
116 *project) of the 31 species considered in this analysis. Dark green circles reflect pests on*  
117 *annual crops (mainly agricultural pests) and light green circles pests on perennial crops*  
118 *(mainly forestry pests).*

119

## 120 **Materials and methods**

121 **Data selection.** Thirty-one of the socioeconomically and ecologically most detrimental  
122 phytophagous insect pests globally were selected that collectively: infest both agricultural  
123 and forestry crops, represent diverse feeding guilds, originate from both tropical and  
124 temperate environments, have large geographic ranges (preferably covering several  
125 continents), and have been well studied and monitored over recent decades (Fig. 1). A  
126 lack of rigorous long-term monitoring, with consistent sampling effort, is probably the  
127 biggest limitation hindering efforts to characterize biological systems' responses to  
128 climate change robustly. Because of their large economic impact, insect pests represent  
129 a group of organisms with relatively good data compared to other groups; data are  
130 collected frequently but not consistently and data quality tends to be positively correlated  
131 to density and range expansion of the species. Thus, pests are good models for such  
132 efforts because abundant information about their distributions, impacts and interactions  
133 is routinely collected. However, since we selected species with large ranges, our results  
134 can be biased towards responses of species with broad thermal niches, thus the indicated  
135 general effects of climate change are likely conservative. Further, since habitats strongly  
136 affect insect ecology, we assume that species in disparate habitats will have different

137 potential responses to climate change, so we chose species prevalent in a wide spectrum  
138 of lightly-managed to heavily-managed habitats. Then, using Web of Science searches  
139 (Thomson Reuters), we selected three types of studies. First, studies that compared  
140 climate trends and empirically determined trends in relevant aspects of the chosen pests,  
141 e.g. range, abundance or damage (economic and/or ecological). Second, studies that  
142 tracked population-dependent differences in relevant traits (e.g. voltinism) of the pests  
143 across time. Third, studies that modelled attributes of the pests, including a substantial  
144 historical data component. Data sources include studies published in scientific journals,  
145 pest management databases (e.g. EPPO and CABI) and records from national  
146 environment/pest management institutions. We also contacted several experts for  
147 assessments of data quality. The short summaries describing each pest species can be  
148 found in Supplementary File 1. The responses recorded in these studies were classified  
149 into four major types (Fig. 1B), and as either increasing or decreasing pest severity (Table  
150 S1). We used a modified version of a generic impact score system to assess impact and  
151 severity<sup>35</sup>. The impact criteria can be found in Supplement 2 and the qualitatively  
152 assigned categories are found in the attached datafile. As has been suggested in several  
153 recent studies<sup>10,18,36</sup> holistic integrated analyses are to be preferred over single-trait  
154 analyses when assessing climate change responses, and this is what we attempted to  
155 achieve with our approach. Thus while the present study is neither a formal meta-analysis  
156 nor exhaustive, it synthesizes current knowledge of integrated climatic responses of 31  
157 pests with the aim to illustrate general patterns, problems and challenges, in a  
158 precautionary manner.  
159



160 **Rank order correlation.** Associations between explanatory and response variables  
161 regarding effects of climate change on the 31 selected serious insect pests were explored  
162 by Kendall rank order correlation analysis. The results are presented in Table S2, and the  
163 following list explains abbreviations and the range of these variables, which are listed in  
164 the beginning of Supplement 2. NRT = Number of response categories (1 – 4), PA =  
165 Perennial or annual host (1 [perennial] – 3 [annual]), IE = Internal or external feeder (1  
166 [external] – 2 [internal]), BRANK = Mean habitat biome ranked from tundra to tropical (1  
167 [tundra] – 4 [tropical]), AF = Agricultural or Forestry pest (1 [agricultural] – 2 [forestry]),  
168 SEI = Socioeconomic impact (1 [low] – 3 [high]), SEId = Change in Socioeconomic impact  
169 (1 [decrease] – 3 [increase]), ECI = Ecological impact (1 [low] – 3 [high]), ECId = Change  
170 in ecological impact (1 [decrease] – 3 [increase]), GD = Difference in responses to climate  
171 change between geographical areas of range (1 [no] – 2 [yes]). This analysis was run in  
172 SPSS v. 24.0 (IBM Corp., Armonk, NY, USA).

173

174 **Optimal temperature in the past, the present and the future.** A meta-analysis on  
175 optimal temperatures of the 31 insect pest species was conducted to quantify potential  
176 climate change stress. We extracted optimal temperatures for development ( $T_{opt}$ ) for the  
177 species from the primary literature, giving priority to studies investigating temperature  
178 dependence of the whole life-cycle, as well as using populations from the core of the  
179 range (Table S3). Latitude and longitude coordinates were either copied straight from the  
180 article, or extracted from global maps based on the sampling location reported in the  
181 original article.

182

183 Ambient temperatures at each location in our species database (Table S3) were extracted  
184 from a Global Circulation Model that forms part of the *Coupled Model Intercomparison*  
185 *Project* phase 5<sup>37,38</sup>, which we sourced directly from the Earth System Grid database  
186 (<http://pcmdi9.llnl.gov/>). More specifically we considered predictions of average monthly  
187 near surface temperature (ambient temperature hereafter,  $T_{amb}$ ) from the HadGEM2-CC  
188 model<sup>39</sup>. For the present and future conditions, we considered models with a radiative  
189 forcing of  $8.5Wm^{-2}$  (Representative Concentration Pathway 8.5), the most extreme  
190 climate warming scenario included in the IPCC Fourth Assessment report<sup>8</sup>, and that which  
191 is most representative of current trajectories<sup>40</sup>. Here, we aimed to capture “present”  
192 ambient temperatures (2006-2015), “near-future” ambient temperatures (2056-2065) and  
193 “future” ambient temperatures (2070-2079). The “past” ambient temperatures (1960-  
194 1969) were extracted from the historical experiment of the same model. Across each of  
195 these four decades, we calculated an overall average mean temperature from the 12  
196 monthly averages for each year. As species at high latitudes in the northern hemisphere  
197 undergo a period of dormancy during winter (and hence are buffered from winter  
198 temperatures), for locations above  $45^{\circ}$  latitude (15 of 38 locations, Table S3), we  
199 considered only temperatures during the summer months from May to September  
200 inclusive. Data were extracted from raw files, and subsequently cleaned using functions  
201 in the “raster” package for R<sup>41</sup>. The full R-code workflow can be found at GitHub:  
202 [[https://github.com/madeleine-barton/Complex\\_pest\\_responses](https://github.com/madeleine-barton/Complex_pest_responses)].

203

204 The overall  $T_{amb}$  for each of the time periods were compared against the species  $T_{opt}$  at  
205 each location in two ways. First by visually comparing the differential between  $T_{opt}$  and

206  $T_{amb}$  (Fig. 3), where a small value (close to 0) indicates high thermal suitability, and then  
207 with a phylogenetically corrected generalized linear least square model (pgls)  
208 investigating the relationship between thermal suitability (expressed as  $T_{amb} / T_{opt}$ ) and  
209 absolute latitude. A high value (close to 1) indicates high thermal suitability. Models were  
210 run using primarily the “pgls” function in the “caper” package for R<sup>42</sup>. Overall model results  
211 are shown in Table S4 and the full R-code workflow can be found at GitHub:  
212 [[https://github.com/madeleine-barton/Complex\\_pest\\_responses](https://github.com/madeleine-barton/Complex_pest_responses)].

213

## 214 **Results and discussion**

215 **Insect pest responses to contemporary climate change are complex.** Of the 31  
216 insect pest species selected for the study, 29 (94%) reportedly show some response  
217 attributable to contemporary climate change (Table S1), and 28 (90%) present more than  
218 one response (Fig. 2a). Of the 29 showing some response 26 (90%), 18 (62%), 16 (55%)  
219 and 4 (14%) respectively show changes in: geographic range, population dynamics, life-  
220 history (traits related to phenology and voltinism), and trophic interactions (Fig. 2b). While  
221 at least one reported response of almost all of these species is likely to increase pest  
222 severity (e.g. range expansion or increases in population density), 59% (17/29) of them  
223 also show responses likely to reduce pest severity (e.g. range contraction or decreased  
224 physiological performance), and often this reduction occurs simultaneously with other  
225 responses likely to increase severity (Fig. 2c). The most common severity-reducing  
226 responses are reduction in pest population density (13/29), followed by range contraction  
227 (6/29) (Fig. 2c).

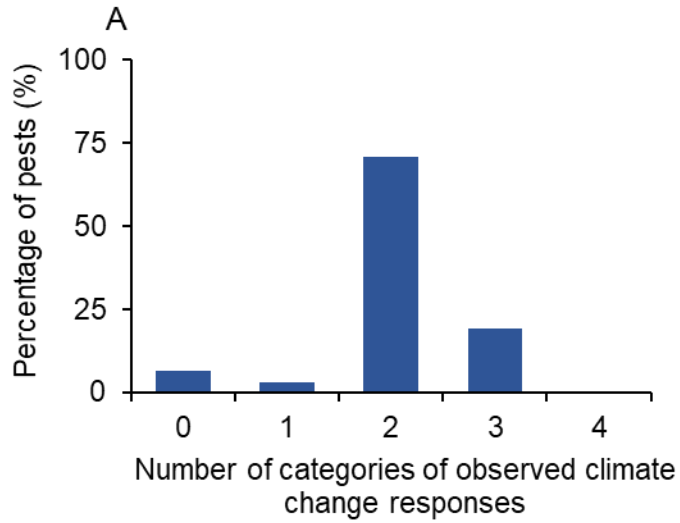

Panel A displays proportions of species showing no response to climate change, or responses in 1, 2, 3 or 4 of the designated categories

- Range changes (RC)
- Life-history traits (LH)
- Population dynamics (PD)
- Trophic interactions (TI)

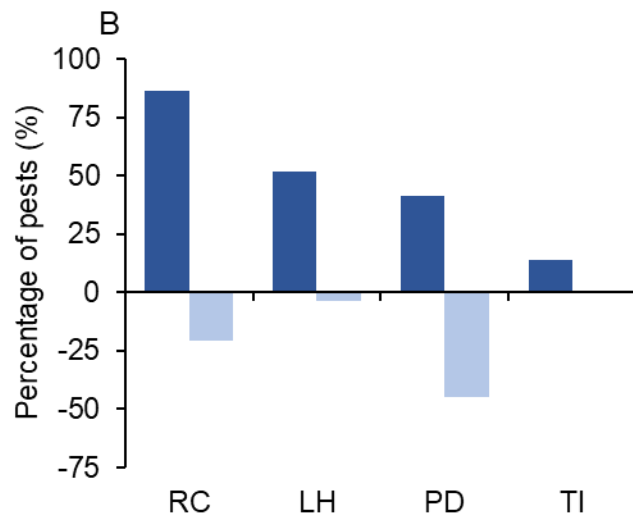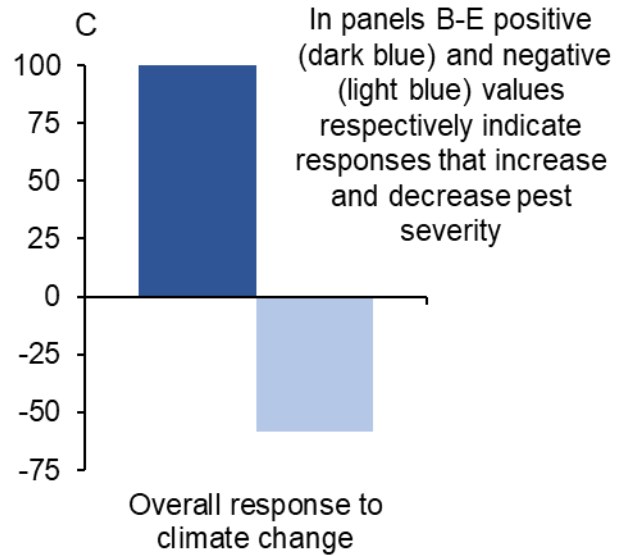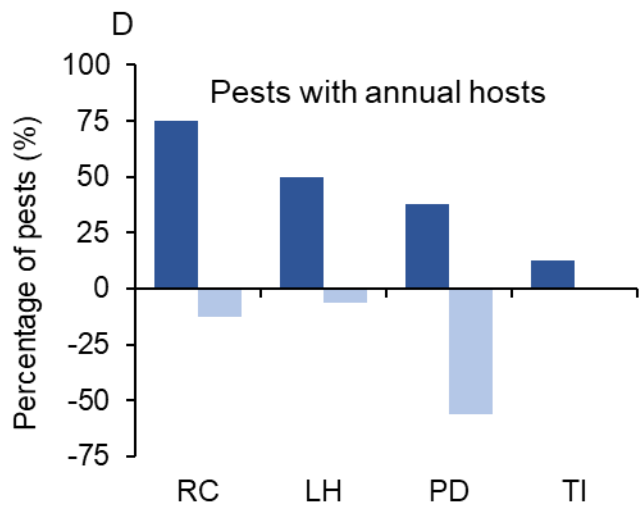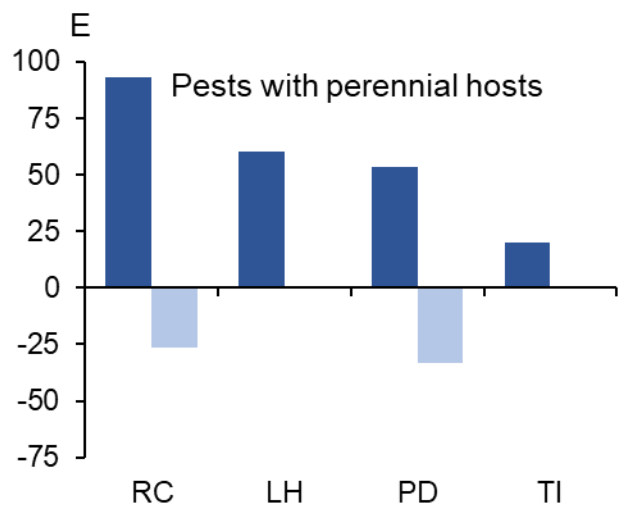

229 **Fig. 2** Responses to climate change of 31 insect pests with high socioeconomic and/or  
230 ecological impact. (A) Shows the number of species responding in 0 to 4 traits to ongoing  
231 climate change. Dark and light blue columns in (B-E) show percentages of the 31 insect  
232 pest species displaying severity-increasing responses (e.g. increased range) and  
233 severity-decreasing responses (e.g. decreased economic damage due to smaller  
234 population size) to climate change in the four traits investigated here. Single species may  
235 show responses to multiple and (B-E) only display data for the 29 species that showed  
236 some response attributable to climate change (see Supplement 2). Observe that in (B-E)  
237 some species showed no response in some traits, so total percentages in these cases  
238 are less than 100% (i.e. if all 29 species show a response increasing severity due to range  
239 expansion, this trait would receive a value of 100%).

240  
241 Responses of 59% (17/29) of the pest species with reported sensitivity to contemporary  
242 climate change have also varied between different parts of their ranges. For example, the  
243 range of the Colorado potato beetle (*Leptinotarsa decemlineata*) has expanded  
244 northwards in recent decades, and its population density has increased in core European  
245 areas (Table S1). The range of the winter moth (*Operophtera brumata*) has also  
246 expanded, towards higher latitudes and more continental areas at the northern European  
247 edge of its range, and its trophic interactions have changed in the boreal-tundra ecotone,  
248 where outbreaks have spread from the main host *Betula pubescens* to an alternative host  
249 (*B. nana*) above the tree-line (Table S1). Several species also show both severity-  
250 increasing and severity-reducing responses in different parts of their ranges. Notably,  
251 thermal tracking<sup>43,44</sup> has been observed in some species (4/17), e.g. the spruce budworm

252 (*Choristoneura fumiferana*; Table S1) has expanded its geographic range towards higher  
253 latitudes while it has retracted, or its abundance has declined, at lower latitudes. Similarly,  
254 northward range expansion of the hemlock woolly adelgid (*Adelges tsugae*) has been  
255 observed in the USA, while the economic damage it causes is decreasing in the southern  
256 part of its range due to poor heat tolerance of young nymphs during summer (Table S1).

257

258 **Do responses of phytophagous pests on annual and perennial crops differ?** The  
259 main response patterns of pests of annual (mainly agricultural pests) and perennial  
260 (mainly forestry pests) crops are similar, with some subtle differences. Contrary to  
261 expectations based on differences in feeding or host ecology, and evolutionary  
262 constraints, pests of annual crops show more severity-reducing responses than pests of  
263 perennial crops (e.g. trees). To assess the potential impact of agricultural and forest pest  
264 responses to climate change, we categorized the species according to their historic and  
265 current socio-economic and ecological impacts, and effects of contemporary climate  
266 change on those impacts. Overall socio-economic and ecological impacts have reportedly  
267 increased across the geographic ranges of species that have responded to climate  
268 change<sup>11,20,20</sup>. More importantly, while all the considered pests on perennial crops already  
269 have large ecological impact, 85% (17/20) of the pests on annual crops currently have  
270 relatively low ecological impact beyond the cropping systems they infest. However,  
271 climate change might be inducing increases in the relatively low impact of some pests on  
272 annual crops. For instance, the green stink bug (*Nezara viridula*) and maize stem borer  
273 (*Chilo partellus*) displace native bugs and borers, respectively, as their ranges expand  
274 (Table S1). Further, the range of the western corn rootworm (*Diabrotica virgifera virgifera*)

275 in Europe has expanded, and it can cause large ecological damage by spreading maize  
276 chlorotic mottle virus to several natural hosts (Table S1). A potential explanation is that  
277 reductions in phenological constraints associated with climate warming (mediated for  
278 instance by increases in host growth season, or shorter and milder winters<sup>45</sup>), can  
279 increase interactions between pests in annual agricultural habitats and surrounding  
280 ecosystems<sup>36,46</sup>, thereby increasing ecological impacts. Indeed even small phenological  
281 mismatches might have large knock on effects for ecosystem function and predator prey  
282 interactions<sup>14,36</sup>.

283  
284 In addition to the fact that latitudinal differences in pest distributions might modulate  
285 climate change effects, several other mechanisms could be involved in the divergence of  
286 responses in annual and perennial systems. Unlike forestry pests, agricultural pests are  
287 generally associated with fragmented habitats<sup>47</sup> and may therefore have higher local  
288 extinction risks due to Allee effects when climate changes<sup>13</sup>. Further, while climate  
289 change can disrupt biological control by natural enemies in either annual or perennial  
290 systems<sup>48</sup>, the biological control agents frequently introduced in annual systems may  
291 have lower genetic diversity than native agents, and hence lower adaptive capacity to  
292 respond to environmental changes<sup>49</sup>. Direct effects of climate change on the performance  
293 and phenology of pests have been detected in both annual and perennial systems. Since  
294 pests often persist through part of the season in a resting or dormant stage, especially at  
295 high latitudes and/or altitudes<sup>45</sup>, climate change can contribute to phenological  
296 mismatches between hosts and emergence of key life-stages<sup>14,22,46</sup>, as seen in *O.*  
297 *brumata* (Table S1). However, pests in annual and perennial systems might differ in

298 general susceptibility to phenological mismatching, *inter alia* the former might be more  
299 sensitive to phenological host limitation; especially relative to bark beetles and root  
300 feeders. Taken together, while there are some differences that seem to associate with  
301 whether the system is annual or perennial, pests in both systems show large variability in  
302 how ongoing climate change is affecting both their ecological and socioeconomic impact.

303

304 **Past, present and future temperature stress on the major insect pests.** It has been  
305 argued that pests may suffer negative consequences of ongoing climate change owing  
306 to reduced thermal suitability and increasing frequency of high temperature extremes  
307 leading to population reductions<sup>50</sup>. For further exploration of this in our focal species, we  
308 assess the proximity of optimum development temperature ( $T_{opt}$ ) of the 31 pest insects  
309 compared to their ambient habitat air temperatures ( $T_{amb}$ ) (Fig. 3). Relating ambient  
310 temperature during the growing season in past, present and future climates to  $T_{opt}$  shows  
311 large variability in how pests are expected to benefit from climate change owing to  
312 regional complexity. In general, warming climates are expected to be beneficial for growth  
313 and development, and indeed, in all but two cases  $T_{amb}$  closely approached  $T_{opt}$  when  
314 comparing past, current, near future and future climates (Fig. 3B). This conclusion was  
315 also supported by a phylogenetically-informed regression analysis (Table S4). Further,  
316 this analysis suggested that pests at higher latitudes have greater disparity between  $T_{amb}$   
317 and  $T_{opt}$ , indicating greater capacity to benefit from climate warming, unlike more low  
318 latitude pests that are already close to  $T_{opt}$ . Low latitude species also potentially risk  
319 increasing frequency and intensity of heat stress as climate warms<sup>51</sup>, a notion receiving  
320 support in a recent analysis of the upper thermal tolerance of 15 dipteran pests<sup>50</sup>.



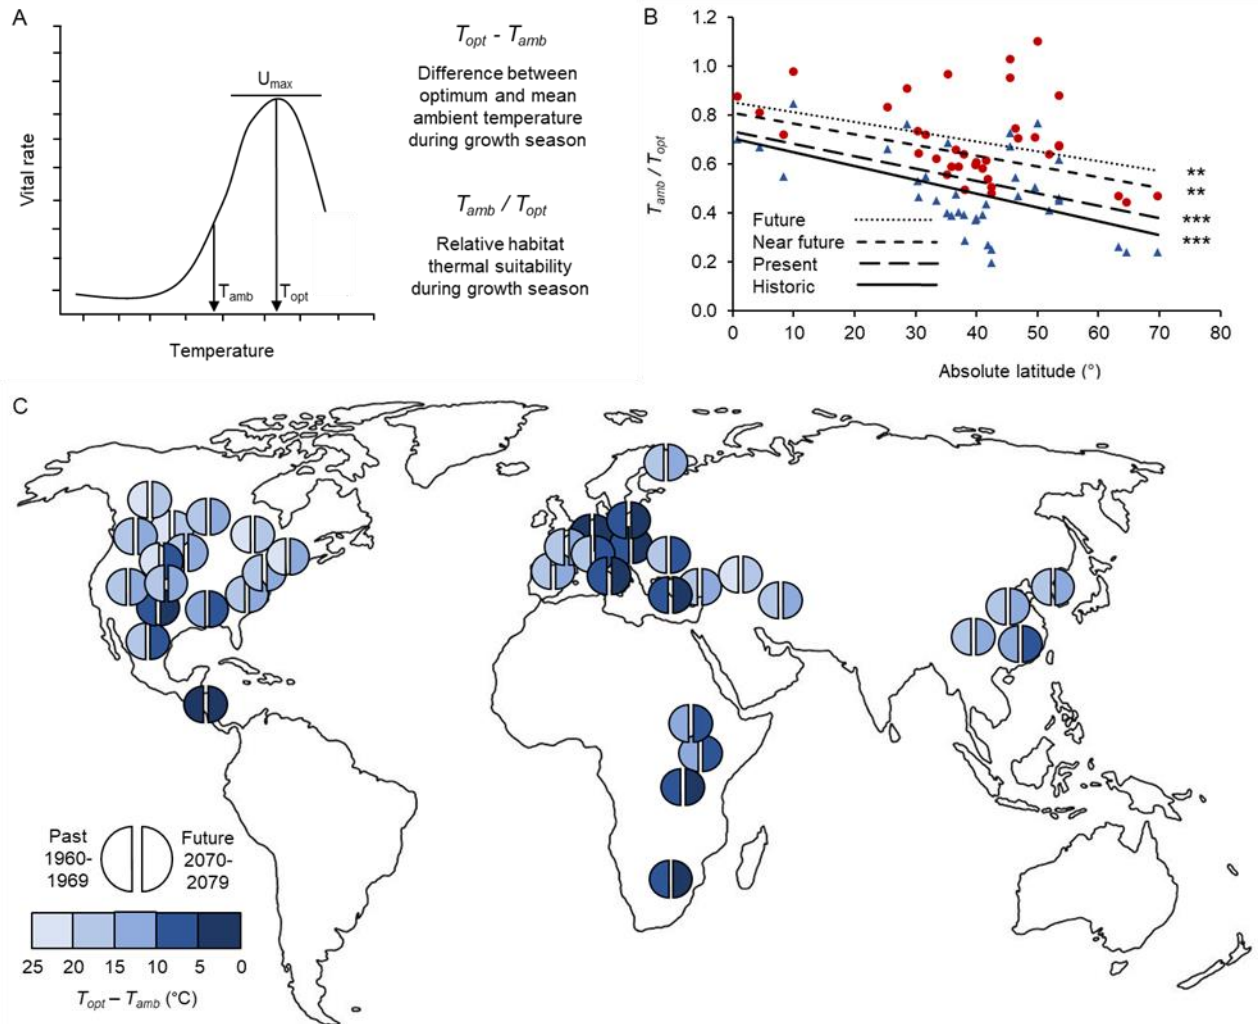

321

322 **Fig. 3** Summary figure of thermal sensitivity analysis of 31 insect pests. As input we use  
 323 published optimum temperatures of the species ( $T_{opt}$ , the temperature at which  
 324 performance is maximised,  $U_{max}$ ) and mean ambient temperature ( $T_{amb}$ ) during the  
 325 growing season. This includes the whole year below 45°S/N, and the summer months  
 326 above 45°S/N. (A) Schematic thermal performance curve including the two metrics  
 327 extracted. (B) Here  $T_{amb} / T_{opt}$  is plotted against latitude for the four periods investigated  
 328 (historical: 1960-1969 [blue triangles and dotted line], present: 2006-2015 [fine dashed  
 329 line], near future: 2056-2065 [coarse dashed line] and future: 2070-2079 [red circles and

330 *solid line*). Stars denote significant correlations in a phylogenetically corrected  
331 generalized linear least square model: \* =  $P < 0.05$ , \*\* =  $P < 0.005$ . (C) Shows how many  
332 degrees  $T_{amb}$  differs from  $T_{opt}$  in past (left half of circle) and future (right half of the  
333 circle) climates. Circles have been placed in the approximate location where individual  
334 studies sampled the respective pests. Darker colors reflect ambient temperatures near  
335 the optimum temperature and therefore climates likely beneficial for pests.

336

337 However, examination of patterns in more species, as well as on other thermal traits,  
338 especially upper thermal limits or feeding (damage) rates, would be required to validate  
339 this hypothesis. Agricultural pests accounted for only 4% of the ca. 380 species included  
340 in the database of upper thermal limits compiled by Hoffmann et al.<sup>52</sup>, highlighting a  
341 potential information gap in the current literature. While the pests in the current data  
342 represent a wide geographic distribution (Fig. 1A), the studies on  $T_{opt}$  used here mostly  
343 reflect populations sampled in the northern hemisphere (Fig. 3C). This is a general  
344 problem found in other large-scale analyses of climate change responses, such as  
345 phenology<sup>36</sup> and insect metabolic or development rate-temperature databases<sup>53</sup> showing  
346 a need for further studies covering underrepresented locations. Finally, as air  
347 temperatures are reported in the global temperature database, there is risk of  
348 underestimation of microclimate variability<sup>51</sup> and thus the extent of potential buffering  
349 owing to three-dimensional habitat complexity of operative temperatures<sup>51,51,54</sup>.

350

351 **Evolutionary responses of insect pests to climate change.** Insect pests may evolve  
352 rapidly in response to contemporary climate change<sup>16,55-59</sup>. Thus, apparently sound

353 projections of insect pest responses to climate change<sup>11</sup> may be compromised if  
354 evolutionary responses are not considered<sup>60</sup>. Indeed, rapid evolutionary effects have  
355 influenced - or could influence further - projections for several of the 31 species  
356 considered here (see Supplement 1). For example, disruption of phenological synchrony  
357 between *O. brumata* and oak in temperate Europe due to increasing temperatures<sup>30</sup> has  
358 been apparently restored by a hereditary change in egg hatching dates<sup>61</sup>. Also, range  
359 expansions of some of the forestry pests induced by climate change have resulted in  
360 colonization of areas with novel host tree species that have little innate resistance due to  
361 lack of co-evolution with the pests<sup>5</sup>. In contrast, the similarity of crops grown across large  
362 areas might promote co-evolution between agricultural pests and their hosts<sup>62</sup>. Links  
363 between biological invasions or range expansion events, climate change and evolutionary  
364 processes have received recent attention<sup>9,17,21,59</sup>, but there is still pressing need for further  
365 research in this field. The effects of management practices and evolution have generally  
366 been considered too much in isolation, especially in climate-change contexts<sup>18,49</sup>.

367

368 **Conclusions.** The 31 widely-distributed pest insects that seriously affect agricultural or  
369 forestry systems studied here show multiple and varying responses to climate change.  
370 By providing an up-to-date database that reviews biological responses to climate change  
371 in the selected pests (Supplement 1) we offer standardized information that can be further  
372 explored by other researchers. Although the present analyses cannot be considered  
373 absolute, complete, and without taxonomic, geographic and study intensity biases<sup>10</sup>, we  
374 nevertheless detected several overarching patterns that allow us to draw some general  
375 conclusions.

376

377 1. The data suggest that determining the net severity change of pests to climate change  
378 is complex since most species considered here have shown multiple responses that  
379 vary spatially<sup>24</sup>. The present study also provides evidence for mixed directionality of  
380 responses as well as potential explanations thereof based on general mechanisms.  
381 This set of complex but predictable outcomes and regional heterogeneity of responses  
382 is challenging for management but cannot be ignored as it is the emerging consensus  
383 in this and other studies<sup>11,19</sup>.

384 2. The current study urges caution in performing large-scale analyses only with single  
385 traits, since single pests often show mixed directionality of effects of climate change  
386 in different traits. Lacking the interactions among different traits in each pest species  
387 may easily lead to incomplete conclusions. To correct this we recommend more in-  
388 depth studies of biological mechanisms in a few representative species. For example,  
389 a recent meta-analysis shows that models integrating biological mechanisms from  
390 multiple traits significantly improve predictions of climate change impacts on global  
391 biodiversity<sup>18</sup>.

392 3. Mounting evidence suggests that pests and their hosts are responding not only  
393 through ecological, but also evolutionary processes to climate change<sup>17,57,59</sup>. Thus,  
394 evolutionary approaches might be under-exploited in pest management strategies<sup>49</sup>.  
395 Including evolutionary and ecological information when formulating integrated  
396 management strategies may facilitate robust intervention and control (as recently  
397 demonstrated in disease vector control programs<sup>63</sup>). Furthermore, it would be useful  
398 to pinpoint species with high evolvability in traits relevant to climate change<sup>17</sup>, or that

399 show trade-offs between traits linked to basal climatic stress resistance and  
400 plasticity<sup>59,64</sup>.

401 4. Combining data from large-scale experiments (e.g. mesocosm) and computational  
402 models may improve estimates of climate change effects<sup>19,59,65</sup>. Experiments should  
403 be designed to assess variance components with indicated importance in climate  
404 modelling studies, to identify the factors related to climate change that most strongly  
405 influence pest population growth and performance, such as for example the increased  
406 feeding efficacy of the Japanese beetle (*Popillia japonica*) on carbon dioxide-enriched  
407 soybean<sup>66</sup>. Indications that the response to climate change differ among trophic levels,  
408 translating into shifts in the relative importance of bottom-up and top-down population  
409 processes<sup>67</sup> needs to be studied further as even relatively small changes could result  
410 in large effects when multiple interactions are affected simultaneously<sup>68</sup>. Standardized  
411 experiments enable high-throughput investigation of pests (for recent example see<sup>69</sup>)  
412 and facilitate the development of watchlists or prioritization tools (such as The UK  
413 Plant Health Risk Register<sup>70</sup>) of key species that require further study. However, as  
414 the current data suggest large regional variability in pest responses to climate change,  
415 national or regional databases, while excellent locally, might offer poor insight into  
416 invasions into other regions unless coordinated or standardized efforts are attained,  
417 especially across political boundaries.

418 5. As  $T_{amb}$  is generally increasing towards  $T_{opt}$  for growth and development in these  
419 species, there is an expectation of increasing pest severity under future climate  
420 scenarios<sup>71</sup>. However, the relative benefit of increasing ambient temperatures is  
421 negligible for many of the studied pests (Fig. 3C). Indeed, since low-latitude species

422 already showed  $T_{amb}$  close to  $T_{opt}$ , as climates warm  $T_{amb}$  for these species may  
423 surpass  $T_{opt}$ , thus decreasing pest severity, under future climates<sup>50,51</sup>.  
424 6. Finally, and importantly, the patterns of regional variability and complexity described  
425 here are likely to apply to non-pest insects as well as non-insect species in addition to  
426 the 31 insect pest species assessed here. The extent of generality of responses  
427 across various taxa will be important to assess in future studies<sup>14,20,59,65</sup>.

428

### 429 **Acknowledgements**

430 The authors thank Christer Wiklund, Stig Larsson and Myron Zalucki for insightful  
431 comments, and all contributors to the book, “Climate Change and Insect Pests” edited by  
432 C. Björkman and P. Niemelä, published in 2015 by CABI publishing. The work was  
433 financially supported by the research program ‘Future Forests’. GK acknowledges  
434 financial support from the Leibniz Competition (SAW-2013-IGB-2). SDE acknowledges  
435 financial support by the US Department of Agriculture’s National Institute of Food and  
436 Agriculture (award #2011-68002-3019).

437

### 438 **Author contributions**

439 All authors jointly designed the study and collected species data. SN performed the rank  
440 correlation analysis, PL, JST and MB performed the optimum temperature analysis. All  
441 authors contributed to preparation of the supplements. PL, MB, AB, SDE, JST and CB  
442 prepared the first draft of the paper, and all authors edited the final version. The authors  
443 declare no conflicts of interest.

444

445 **Supplement 1:** Species summaries

446 **Supplement 2:** Extended materials and methods

447

448 **References**

449 1. Thomas MB. Ecological approaches and the development of “truly integrated” pest  
450 management. *Proceedings of the National Academy of Sciences of the United States of America*.  
451 1999;96:5944-5951.

452 2. Godfray HCJ, Beddington JR, Crute IR, et al. Food security: The challenge of feeding 9 billion  
453 people. *Science*. 2010;327:812-818.

454 3. Oerke E-. Crop losses to pests. *Journal of Agricultural Science*. 2006;144:31-43.

455 4. Fajvan MA, Wood JM. Stand structure and development after gypsy moth defoliation in the  
456 appalachian plateau. *Forest Ecology and Management*. 1996;89:79-88.

457 5. Janes JK, Li Y, Keeling CI, et al. How the mountain pine beetle (*dendroctonus ponderosae*)  
458 breached the canadian rocky mountains. *Molecular Biology and Evolution*. 2014;31(7):1803-  
459 1815.

460 6. Zalucki MP, Shabbir A, Silva R, Adamson D, Shu-Sheng L, Furlong MJ. Estimating the  
461 economic cost of one of the world's major insect pests, *plutella xylostella* (lepidoptera: Plutellidae):  
462 Just how long is a piece of string? *Journal of Economic Entomology*. 2012;105(4):1115-1129.

463 7. Bradshaw CJA, Leroy B, Bellard C, et al. Massive yet grossly underestimated global costs of  
464 invasive insects. *Nature Communications*. 2016;7(12986).

- 465 8. IPCC. Summary for policymakers. In: Solomon S, Qin D, Manning M, et al, eds. *Climate change*  
466 *2007: The physical science basis. contribution of working group I to the fourth assessment report*  
467 *of the intergovernmental panel on climate change*. Cambridge: Cambridge University Press;  
468 2007:1-18.
- 469 9. Moran EV, Alexander JM. Evolutionary responses to global change: Lessons from invasive  
470 species. *Ecology Letters*. 2014;17:637-649.
- 471 10. Bellard C, Thuiller W, Leroy B, Genovesi P, Bakkenes M, Courchamp P. Will climate change  
472 promote future invasions? *Global Change Biology*. 2013;19:3740-3748.
- 473 11. Andrew NR, Hill SJ, Binns M, et al. Assessing insect responses to climate change: What are  
474 we testing for? where should we be heading? *PeerJ*. 2013;1(e11).
- 475 12. Deutsch CA. Increase in crop losses to insect pests in a warming climate. *Science*.  
476 2018;361:916-919.
- 477 13. Taylor CM, Hastings A. Allee effects in biological invasions. *Ecology Letters*. 2005;8:895-908.
- 478 14. Thackeray SJ, Henrys PA, Hemming D, et al. Phenological sensitivity to climate across taxa  
479 and trophic levels. *Nature*. 2016;535:241-245.
- 480 15. Parmesan C, Yohe G. A globally coherent fingerprint of climate change impacts across natural  
481 systems. *Nature*. 2003;421:37-42.
- 482 16. Parmesan C. Ecological and evolutionary responses to recent climate change. *Annual Review*  
483 *of Ecology, Evolution, and Systematics*. 2006;37:637-669.



- 484 17. Chown SL, Hoffmann AA, Kristensen TN, Angilletta MJ, Stenseth NC, Pertoldi C. Adapting to  
485 climate change: A perspective from evolutionary physiology. *Climate Research*. 2010;43:3-15.
- 486 18. Urban MC, Bocedi G, Hendry AP, et al. Improving the forecast for biodiversity under climate  
487 change. *Science*. 2016;353:aad8466-1-aad8466-9.
- 488 19. Sutherst RW, Constable F, Finlay KJ, Harrington R, Luck JE, Zalucki MP. Adapting to crop  
489 pest and pathogen risks under a changing climate. *WIREs Climate Change*. 2011;2:220-237.
- 490 20. Bebbler DP, Ramotowski MAT, Gurr SJ. Crop pests and pathogens move polewards in a  
491 warming world. *Nature Climate Change*. 2013;3:985-988.
- 492 21. Parmesan C. Influences of species, latitudes and methodologies on estimates of phenological  
493 response to global warming. *Global Change Biology*. 2007;13:1860-1872.
- 494 22. Pureswaran DS, Roques A, Battisti A. Forest insects and climate change. *Current Forestry*  
495 *Reports*. 2018;4:35-50.
- 496 23. Bonebrake TC, Boggs CL, Stamberger JA, Deutsch CA, Ehrlich PR. From global change to a  
497 butterfly flapping: Biophysics and behaviour affect tropical climate change impacts. *Proceedings*  
498 *of the Royal Society of London B, Biological Sciences*. 2014;281(1793):1-8.
- 499 24. Hill MP, Bertelsmeier C, Clusella-Trullas S, Garnas J, Robertson MP, Terblanche JS.  
500 Predicted decrease in global climate suitability masks regional complexity of invasive fruit fly  
501 species response to climate change. *Biological Invasions*. 2016;18(4):1105-1119.
- 502 25. Bellard C, Leroy B, Thuiller W, Rysman J-, Courchamp F. Major drivers of invasion risks  
503 throughout the world. *Ecosphere*. 2016;7:e01241.

- 504 26. Grayson KL, Johnson DM. Novel insights on population and range edge dynamics using an  
505 unparalleled spatiotemporal record of species invasion. *Journal of Animal Ecology*. 2018;87:581-  
506 593.
- 507 27. McCain C, Szewczyk T, Knight KB. Population variability complicates the accurate detection  
508 of climate change responses. *Global Change Biology*. 2016;22:2081-2093.
- 509 28. Tscharntke T, Tylianakis JM, Rand TA, et al. Landscape moderation of biodiversity patterns  
510 and processes - eight hypotheses. *Biological Reviews*. 2012;87:661-685.
- 511 29. Karp DS, Chaplin-Kramer R, Meehan TD, Martin EA, DeClerck F, Grab H. Crop pests and  
512 predators exhibit inconsistent responses to surrounding landscape composition. *Proceedings of*  
513 *the National Academy of Sciences of the United States of America*. 2018;In Press.
- 514 30. Pecl GT. Biodiversity redistribution under climate change: Impacts on ecosystems and human  
515 well-being. *Science*. 2017;355:eaai9214.
- 516 31. Robinet C, Roques A. Direct impacts of recent climate warming on insect populations.  
517 *Integrative Zoology*. 2010;5:132-142.
- 518 32. Logan JA, Régnière J, Powell JA. Assessing the impacts of global warming on forest pest  
519 dynamics. *Frontiers in Ecology and the Environment*. 2003;1:130-137.
- 520 33. Cammell ME, Knight JD. Effect of climate change on the population dynamics of crop pests.  
521 *Advances in Ecological Research*. 1992;22:117-162.
- 522 34. DeLucia EH, Nability PD, Zavala JA, Berenbaum MR. Climate change: Resetting plant-insect  
523 interactions. *Plant Physiology*. 2012;160:1677-1685.

- 524 35. Kumschick S, Bacher S, Evans T, et al. Comparing impacts of alien plants and animals in  
525 europe using a standard scoring system. *Journal of Applied Ecology*. 2015;52:552-561.
- 526 36. Cohen JM, Lajeunesse MJ, Rohr JR. A global synthesis of animal phenological responses to  
527 climate change. *Nature Climate Change*. 2018;8:224-228.
- 528 37. Riahi K, Rao S, Krey V, et al. RCP 8.5 — A scenario of comparatively high greenhouse gas  
529 emissions. *Climate Change*. 2011;109:33-57.
- 530 38. Taylor KE, Stouffer RJ, Meehl GA. An overview of CMIP5 and the experiment design. *Bulletin*  
531 *of the American Meteorological Society*. 2012;93:486-498.
- 532 39. Martin GM, Bellouin N, Collins WJ, et al. The HadGEM2 family of met office unified model  
533 climate configurations. *Geoscientific Model Development*. 2011;4:723-757.
- 534 40. Jackson RB, Le Quéré C, Andrew RM, et al. Warning signs for stabilizing global CO2  
535 emissions. *Environmental Research Letters*. 2017;12:110202.
- 536 41. Hijmans RJ, van Etten J. Raster: Geographic analysis and modeling with raster data. . 2012.
- 537 42. Freckleton RP, Harvey PH, Pagel M. Phylogenetic analysis and comparative data: A test and  
538 review of evidence. *American Naturalist*. 2002;160:712-726.
- 539 43. Labra A, Pienaar J, Hansen TF. Evolution of thermal physiology in liolaemus lizards:  
540 Adaptation, phylogenetic inertia, and niche tracking. *American Naturalist*. 2009;174:204-220.
- 541 44. Socolar JB, Epanchin PN, Beissinger SR, Tingley MW. Phenological shifts conserve thermal  
542 niches in north american birds and reshape expectations for climate-driven range shifts.

- 543 *Proceedings of the National Academy of Sciences of the United States of America.*  
544 2017;114:12976-12981.
- 545 45. Bale JS, Hayward SAL. Insect overwintering in a changing climate. *Journal of Experimental*  
546 *Biology.* 2010;213:980-994.
- 547 46. Singer MC, Parmesan C. Phenological asynchrony between herbivorous insects and their  
548 hosts: Signal of climate change or pre-existing adaptive strategy? *Philosophical Transactions of*  
549 *The Royal Society B Biological Sciences.* 2010;365:3161-3176.
- 550 47. Bianchi FJJA, Booij CJH, Tschamntke T. Sustainable pest regulation in agricultural landscapes:  
551 A review on landscape composition, biodiversity and natural pest control. *Proceedings of the*  
552 *Royal Society B.* 2006;273:1715-1727.
- 553 48. Eigenbrode SD, Davis TS, Crowder DW. Climate change and biological control in agricultural  
554 systems: Principles and examples from north america. In: Björkman C, Niemelä P, eds. *Climate*  
555 *change and insect pests.* CABI International, Wallingford, UK.; 2015:119-136.
- 556 49. Thrall PH, Oakeshott JG, Fitt G, et al. Evolution in agriculture: The application of evolutionary  
557 approaches to the management of biotic interactions in agro-ecosystems. *Evolutionary*  
558 *Applications.* 2010;4:200-215.
- 559 50. Terblanche JS, Karsten M, Mitchell KA, Barton MG, Gibert P. Physiological variation of insects  
560 in agricultural landscapes: Potential impacts of climate change. In: Björkman C, Niemelä P, eds.  
561 *Climate change and insect pests.* Wallingford, UK.: CABI International; 2016:92-119.
- 562 51. Sunday JM, Bates A,E., Kearney MR, et al. Thermal-safety margins and the necessity of  
563 thermoregulatory behavior across latitude

- 564 and elevation. *Proceedings of the National Academy of Sciences of the United States of America*.  
565 2014;111(15):5610-5615.
- 566 52. Hoffmann AA, Chown SL, Clusella-Trullas S. Upper thermal limits in terrestrial ectotherms:  
567 How constrained are they? *Functional Ecology*. 2013;27:934-949.
- 568 53. Irlich UM, Terblanche JS, Blackburn TM, Chown SL. Insect rate-temperature relationships:  
569 Environmental variation and the metabolic theory of ecology. *The American Naturalist*.  
570 2009;174:819-835.
- 571 54. Clusella-Trullas S, Chown SL. Comment on “Erosion of lizard diversity by climate change and  
572 altered thermal niches”. *Science*. 2011;332:537.
- 573 55. Bradshaw WE, Holzapfel CM. Genetic shift in photoperiodic response correlated with global  
574 warming. *Proceedings of the National Academy of Sciences of the United States of America*.  
575 2001;98(25):14509-14511.
- 576 56. Hoffmann AA, Reynolds KT, Nash MA, Weeks AR. A high incidence of parthenogenesis in  
577 agricultural pests. *Proceedings of the Royal Society of London B, Biological Sciences*.  
578 2008;75:2473-2481.
- 579 57. Hoffmann AA. Rapid adaptation of invertebrate pests to climatic stress? *Current Opinion in*  
580 *Insect Science*. 2017;21:7-13.
- 581 58. Schilthuizen M, Kellermann V. Contemporary climate change and terrestrial invertebrates:  
582 Evolutionary versus plastic changes. *Evolutionary Applications*. 2013;7:56-67.
- 583 59. Diamond SE. Contemporary climate-driven range shifts: Putting evolution back on the table.  
584 *Functional Ecology*. 2018;In Press.

- 585 60. Merilä J, Hendry AP. Climate change, adaptation, and phenotypic plasticity: The problem and  
586 the evidence. *Evolutionary Applications*. 2013;7:1-14.
- 587 61. van Asch M, Salis L, Holleman LJM, van Lith B, Visser ME. Evolutionary response of the egg  
588 hatching date of a herbivorous insect under climate change. *Nature Climate Change*. 2013;3:244-  
589 248.
- 590 62. Wan F, Yang N. Invasion and management of agricultural alien insects in china. *The Annual*  
591 *Review of Entomology*. 2016;61:77-98.
- 592 63. Bouyer J, Dicko AH, Cecchi G, et al. Mapping landscape friction to locate isolated tsetse  
593 populations that are candidates for elimination. *Proceedings of the National Academy of Sciences*  
594 *of the United States of America*. 2015;112(47):14575-14580.
- 595 64. Sgró CM, Terblanche JS, Hoffmann AA. What can plasticity contribute to insect responses to  
596 climate change? *The Annual Review of Entomology*. 2015;61:433-451.
- 597 65. Fordham DA. Mesocosms reveal ecological surprises from climate change. *PLoS Biology*.  
598 2015;13(12):e1002323.
- 599 66. DeLucia EH, Casteel CL, Nability PD, O'Neill BF. Insects take a bigger bite out of plants in a  
600 warmer, higher carbon dioxide world. *Proceedings of the National Academy of Sciences of the*  
601 *United States of America*. 2008;105(6):1781-1782.
- 602 67. Berggren Å, Björkman C, Bylund H, Ayres MP. The distribution and abundance of animal  
603 populations in a climate of uncertainty. *Oikos*. 2009;118:1121-1126.

604 68. Kollberg I, Bylund H, Jonsson T, Schmidt A, Gerschenson J, Björkman C. Temperature affects  
605 insect outbreak risk through tritrophic interactions mediated by plant secondary compounds.  
606 *Ecosphere*. 2015;6(6):1-17.

607 69. Kong JD, Axford JK, Hoffmann AA, Kearney MR. Novel applications of thermocyclers for  
608 phenotyping invertebrate thermal responses. *Methods in Ecology and Evolution*. 2016;7:1201-  
609 1208.

610 70. Baker RHA, Anderson H, Bishop S, MacLeod A, Parkinson N, Tuffen MG. The UK plant health  
611 risk register: A tool for prioritizing actions. *EPPO Bulletin*. 2014;44:187-194.

612 71. Deutsch CA, Tewksbury JJ, Huey RB, et al. Impacts of climate warming on terrestrial  
613 ectotherms across latitude. *Proceedings of the National Academy of Sciences of the United*  
614 *States of America*. 2008;105(18):6668-6672.

615
